# Supplementary material for: Effect of Zr Doping on the Magnetic and Phase Transition Properties of VO2 Powder
Source: MDPI journal article supplement (doi:10.3390/nano9010113), 2019-01-18
Supplement: s1 [file s1]

## Effect of Zr Doping on the Magnetic and Phase Transition Properties of VO<sub>2</sub> Powder

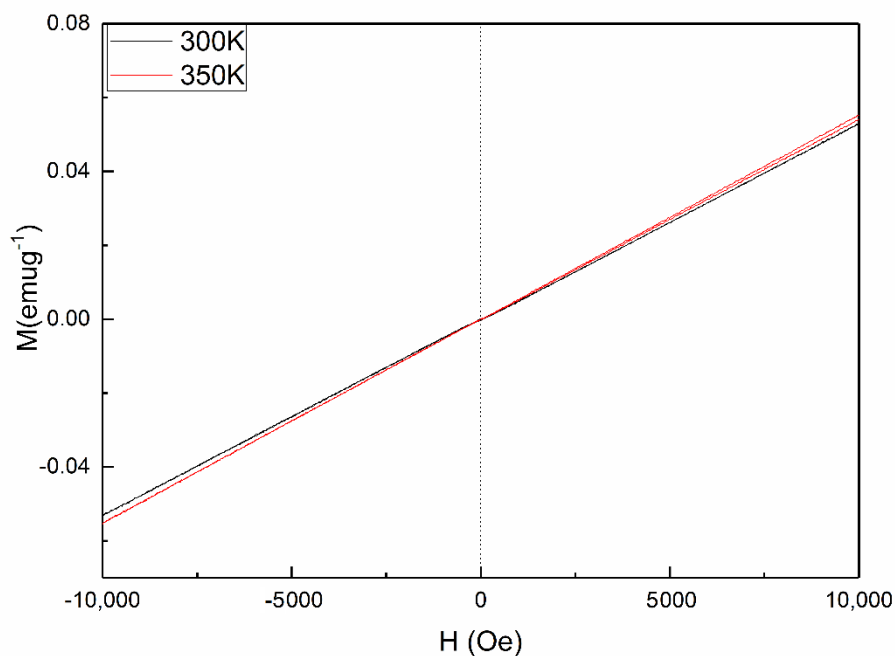

Fig. S1. Moment vs applied field curves of un-doped VO<sub>2</sub> powder samples before and after phase transition (300K and 350K).

From Fig.S1, the slope of un-doped VO<sub>2</sub> powder samples after phase transition is slightly larger than that before phase transition. But no obvious differences were observed in the samples. The un-doped VO<sub>2</sub> powder samples show a paramagnetic behavior before and after phase transition.

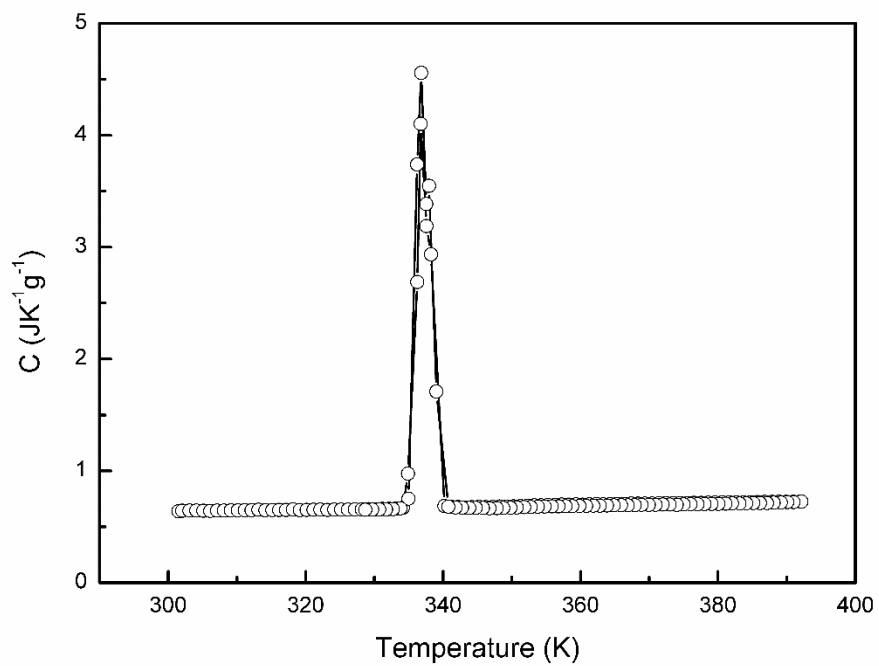

Fig. S2. Specific heat capacity vs temperature of un-doped VO<sub>2</sub> samples.

From Fig. S2, a sharp peak appear at phase transition temperature, which means that the phase transition of VO<sub>2</sub> ascribes to a first-order transition.
